# Supplementary figures and images for: Contributions of primary sources to submicron organic aerosols in Delhi, India
Source: Copernicus journal article supplement (doi:10.5194/acp-2022-179), 2022-03-24

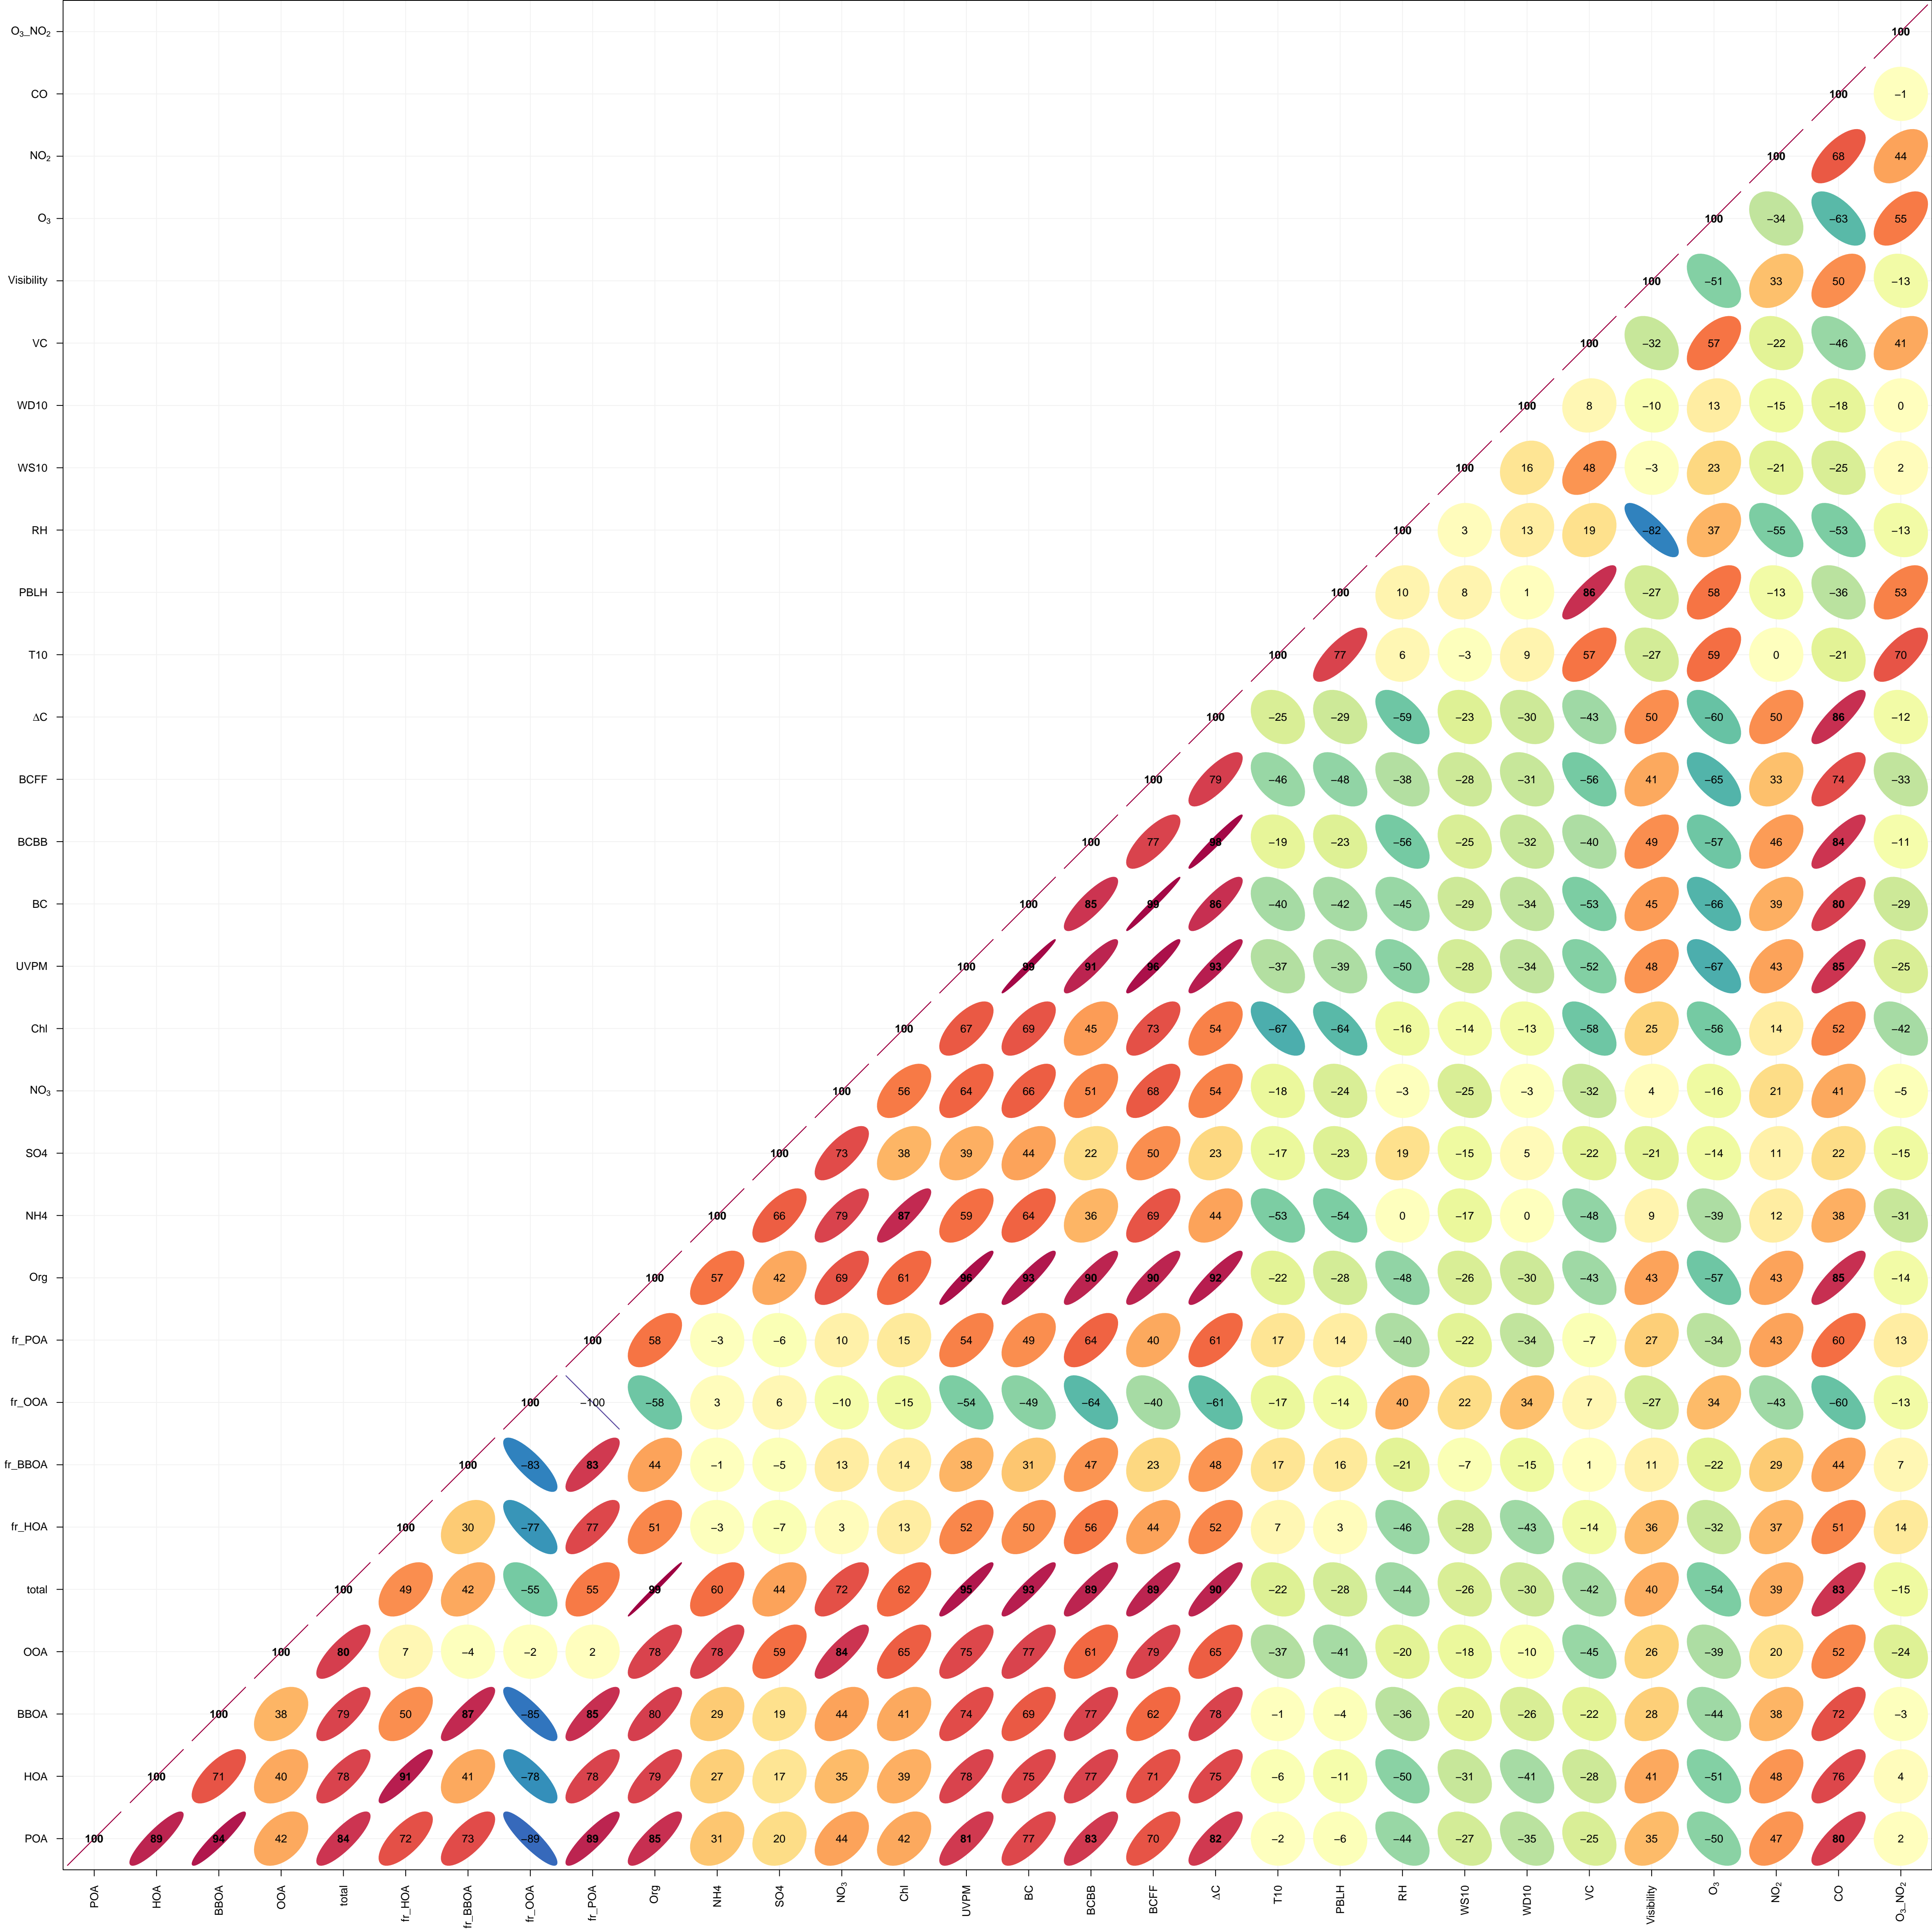

Supplement: Supplementary file 1 [file acp-2022-179-supplement.zip]

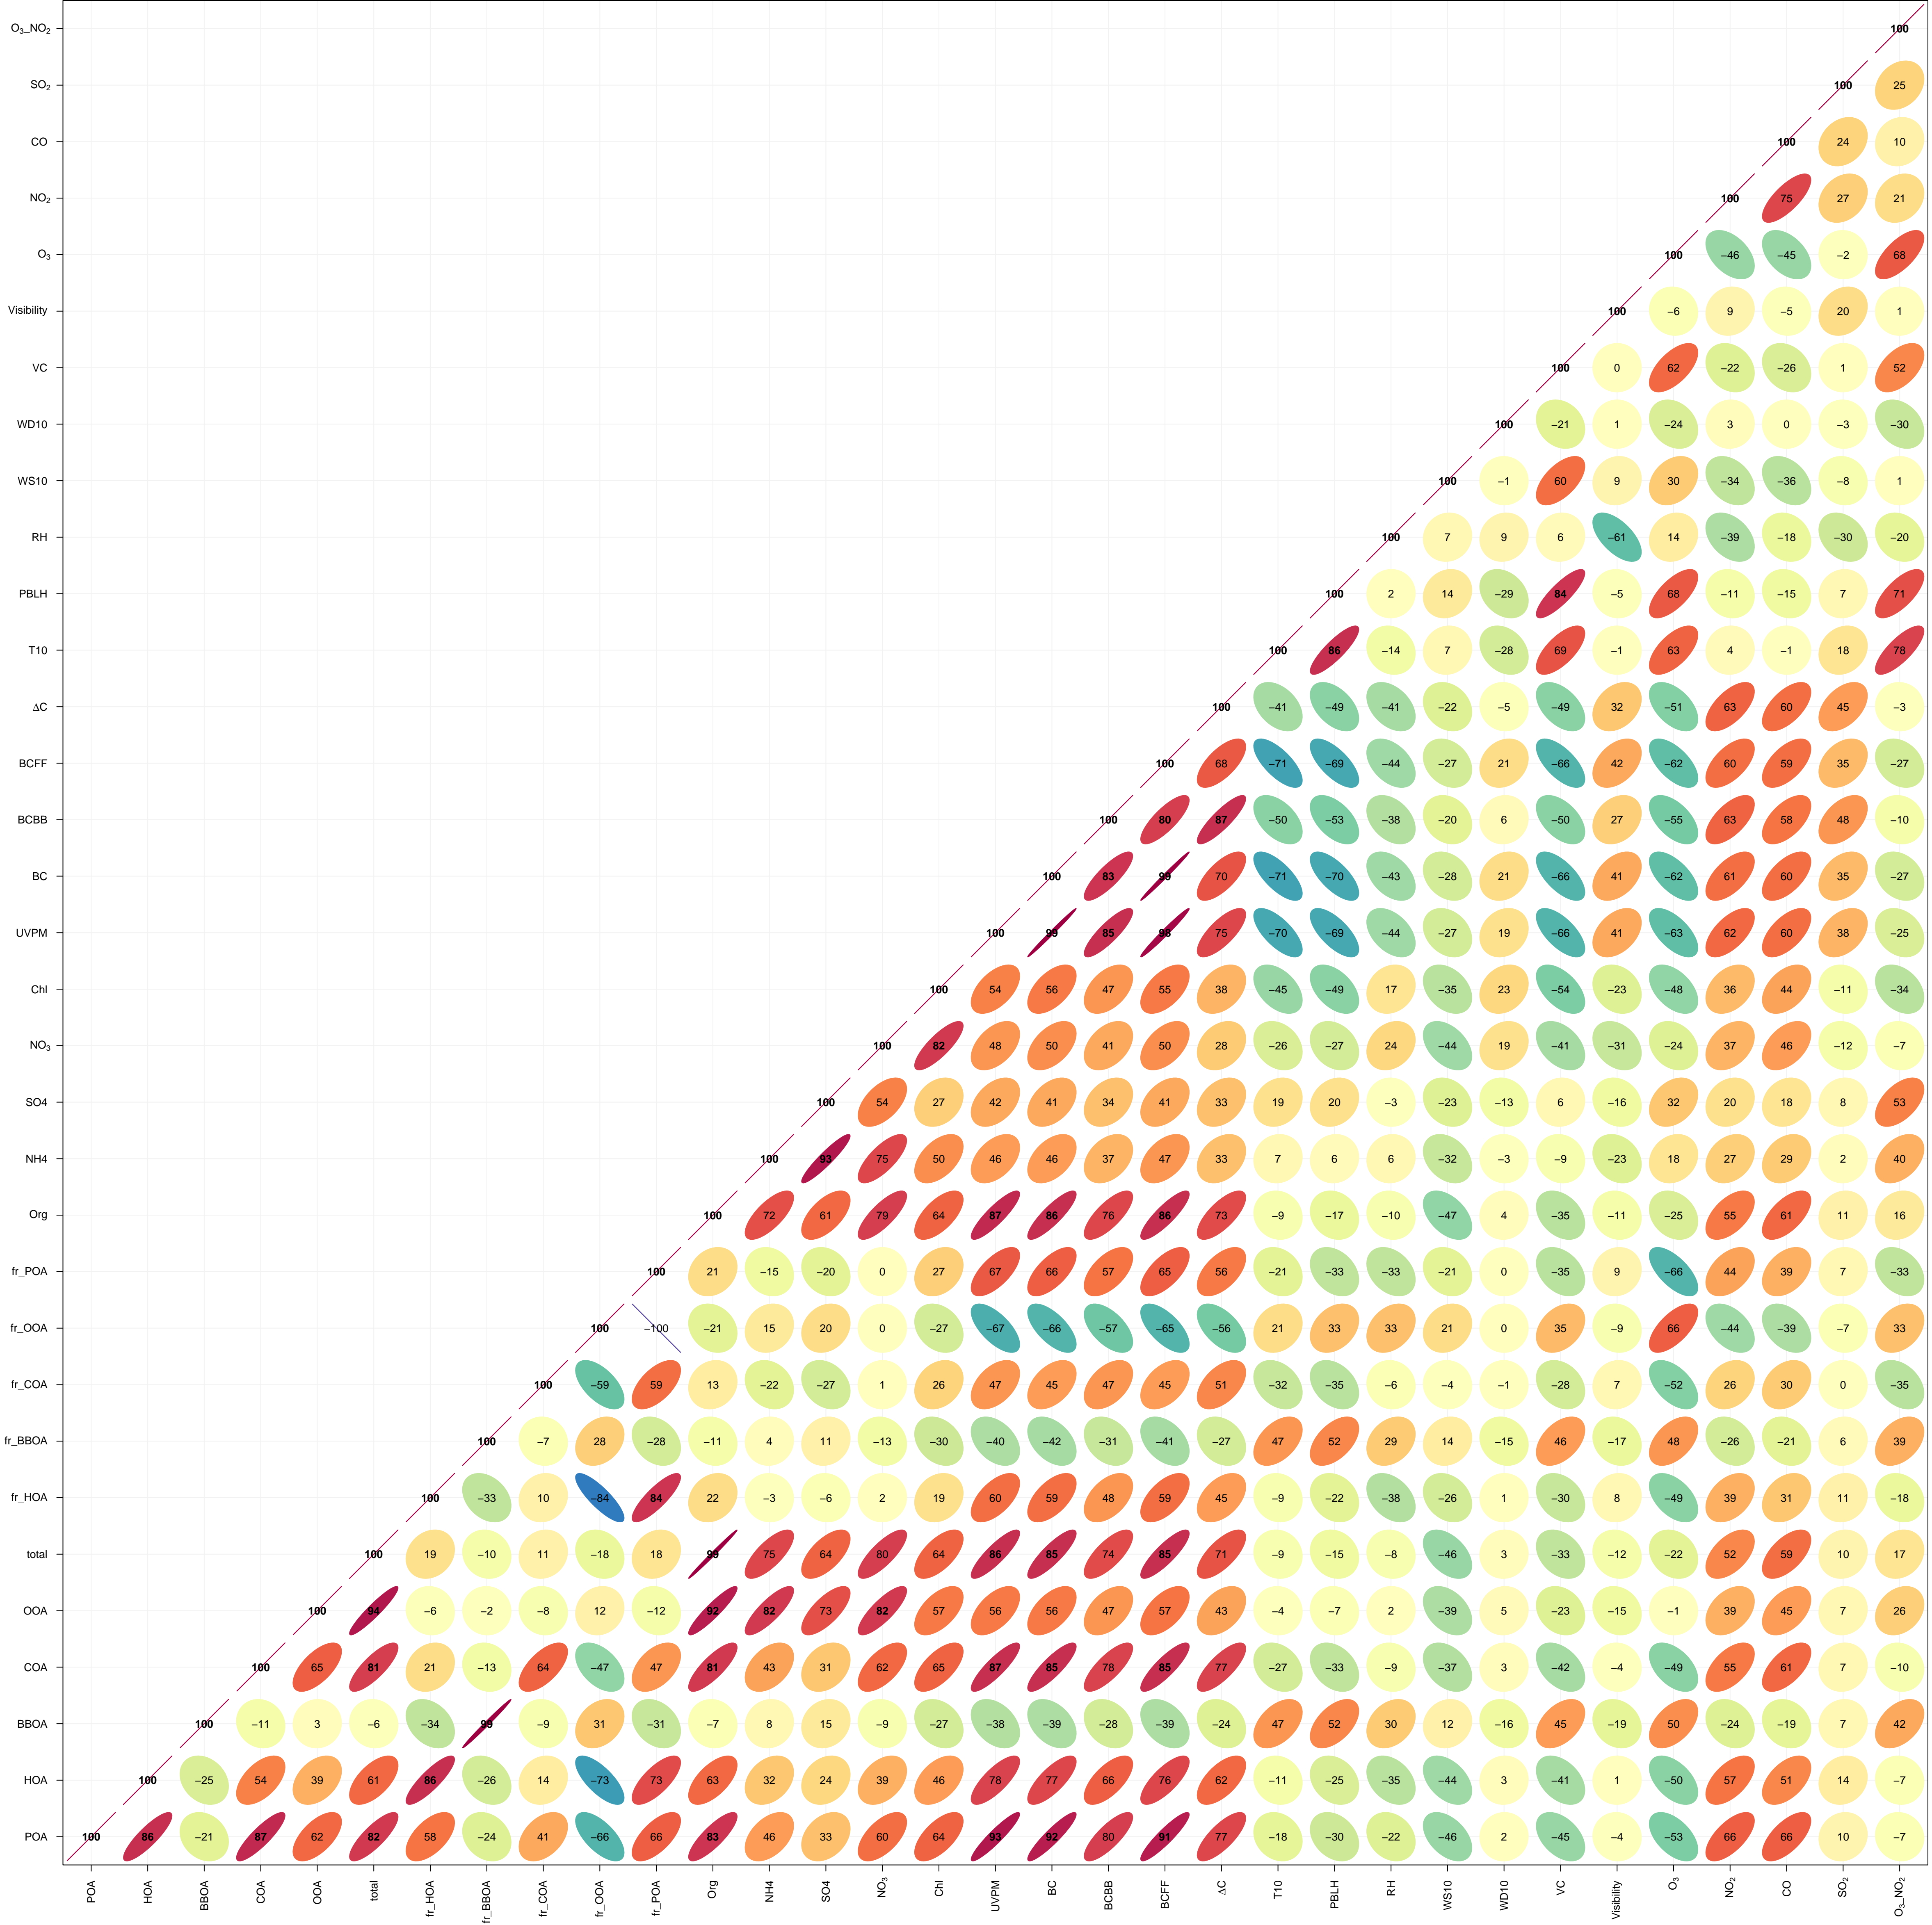

Supplement: Supplementary file 2 [file acp-2022-179-supplement.zip]
